# Supplementary material for: Impact of cognitive capacity on physical performance in chronic obstructive pulmonary disease patients: A scoping review
Source: PubMed Central journal article supplement — Chron Respir Dis. 2023 Apr 7;20:14799731231163874. doi: 10.1177/14799731231163874 (PMC10087654; doi:10.1177/14799731231163874), 2023-04-07
Supplement: sj-pdf-1-crd-10.1177_14799731231163874.pdf [file sj-pdf-1-crd-10.1177_14799731231163874.pdf]

## Supplementary Appendix

### Modified Downs and Black Quality Appraisal Questions:

All questions (with exception of question 5) were scored on the following scale: Yes = 1, No = 0 or Unable to determine = 0.

#### Reporting:

1. Is the hypothesis/aim/objective of the study clearly described?
2. Are the main outcomes to be measured clearly described in the Introduction or Methods section?
3. Are the characteristics of the patients included in the study clearly described?
5. Are the distributions of principal confounders in each group of subjects to be compared clearly described?  
(Scoring: Yes =2; Partially = 1; No=0 or Unable Determine=0).
6. Are the main findings of the study clearly described?
7. Does the study provide estimates of the random variability in the data for the main outcomes?
10. Have actual probability values been reported for the main outcomes except where the probability value is less than 0.001 (i.e. indicating  $P = 0.043$  rather than  $P < 0.05$ )?

#### External Validity:

11. Were the subjects asked to participate in the study representative of the entire population from which they were recruited?
12. Were those subjects who were prepared to participate representative of the entire population from which they were recruited?

#### Internal Validity (Bias)

15. Was an attempt made to blind those measuring the main outcomes of the intervention?
16. If any of the results of the study were based on 'data dredging', was this made clear?
18. Were the statistical tests used to assess the main outcomes appropriate?
20. Were the main outcome measures used accurate (valid and reliable)?

#### Internal Validity (Confounding)

22. Were study subjects in different intervention groups or were the cases and controls recruited over the same period of time?
25. Was there adequate adjustment for confounding in the analyses from which the main findings were drawn?

**Table 1: Modified Downs and Black Quality Appraisal**

| Study (year)                            | Reporting |   |   |   |   |   |    | External Validity |    | Internal Validity - Bias |    |    |    | Internal Validity-Confounding |    | Total Score /16 | Total Score % |
|-----------------------------------------|-----------|---|---|---|---|---|----|-------------------|----|--------------------------|----|----|----|-------------------------------|----|-----------------|---------------|
|                                         | 1         | 2 | 3 | 5 | 6 | 7 | 10 | 11                | 12 | 15                       | 16 | 18 | 20 | 22                            | 25 |                 |               |
| Antonelli-Incalzi <i>et al.</i> (2012)  | 1         | 1 | 1 | 1 | 1 | 1 | 1  | 1                 | 0  | 0                        | 1  | 1  | 1  | 0                             | 1  | 12              | 75.0          |
| Andrianopoulos <i>et al.</i> (2021)     | 1         | 1 | 1 | 2 | 1 | 1 | 0  | 0                 | 0  | 0                        | 1  | 1  | 1  | 0                             | 1  | 11              | 68.75         |
| Bonnevie <i>et al.</i> (2020)           | 1         | 1 | 1 | 0 | 1 | 1 | 1  | 0                 | 0  | 0                        | 1  | 1  | 1  | 1                             | 0  | 10              | 62.5          |
| Cleutjens <i>et al.</i> (2017)          | 1         | 1 | 0 | 1 | 1 | 1 | 1  | 1                 | 0  | 0                        | 1  | 1  | 1  | 0                             | 0  | 10              | 62.5          |
| Cleutjens <i>et al.</i> (2018)          | 1         | 1 | 0 | 1 | 1 | 1 | 1  | 1                 | 0  | 0                        | 1  | 1  | 1  | 0                             | 0  | 10              | 62.5          |
| Cruthirds <i>et al.</i> (2021)          | 1         | 1 | 1 | 1 | 1 | 1 | 1  | 0                 | 0  | 0                        | 1  | 1  | 1  | 1                             | 0  | 11              | 68.75         |
| Dag <i>et al.</i> (2016)                | 1         | 1 | 0 | 2 | 1 | 0 | 1  | 0                 | 0  | 0                        | 1  | 1  | 1  | 0                             | 1  | 10              | 62.5          |
| Emery <i>et al.</i> (1991)*             | 1         | 1 | 1 | 0 | 1 | 1 | 0  | 0                 | 0  | 0                        | 1  | 1  | 1  | 0                             | 0  | 8               | 50.0          |
| Emery. (1994)*                          | 1         | 1 | 1 | 0 | 1 | 1 | 0  | 0                 | 0  | 0                        | 0  | 1  | 1  | 0                             | 0  | 7               | 43.75         |
| Ferrari <i>et al.</i> (2004)            | 1         | 1 | 1 | 0 | 1 | 1 | 0  | 1                 | 0  | 0                        | 1  | 1  | 1  | 1                             | 0  | 10              | 62.5          |
| France <i>et al.</i> (2021)             | 1         | 1 | 1 | 1 | 1 | 1 | 1  | 0                 | 0  | 0                        | 1  | 1  | 1  | 0                             | 0  | 10              | 62.5          |
| Gore <i>et al.</i> (2021)               | 1         | 1 | 1 | 2 | 1 | 1 | 1  | 0                 | 0  | 0                        | 1  | 1  | 1  | 1                             | 1  | 13              | 81.25         |
| Grant <i>et al.</i> (1982)              | 1         | 1 | 1 | 2 | 1 | 1 | 1  | 0                 | 0  | 0                        | 1  | 1  | 1  | 0                             | 0  | 11              | 68.75         |
| Hassan <i>et al.</i> (2020)             | 1         | 1 | 1 | 1 | 1 | 1 | 1  | 0                 | 0  | 0                        | 1  | 1  | 1  | 0                             | 0  | 10              | 68.75         |
| Heraud <i>et al.</i> (2018)             | 1         | 1 | 1 | 1 | 1 | 1 | 1  | 0                 | 0  | 0                        | 1  | 1  | 1  | 0                             | 0  | 10              | 62.5          |
| Karpman <i>et al.</i> (2014)            | 1         | 1 | 1 | 0 | 1 | 1 | 1  | 0                 | 0  | 0                        | 1  | 1  | 1  | 0                             | 0  | 9               | 56.25         |
| Kaygusuz (2021)                         | 1         | 1 | 1 | 2 | 1 | 1 | 1  | 0                 | 0  | 0                        | 1  | 1  | 1  | 0                             | 0  | 11              | 68.75         |
| Morlino <i>et al.</i> (2017)            | 1         | 1 | 0 | 0 | 1 | 1 | 0  | 0                 | 0  | 0                        | 1  | 1  | 1  | 0                             | 0  | 7               | 43.75         |
| Ozsoy <i>et al.</i> (2020)              | 1         | 1 | 1 | 0 | 1 | 1 | 1  | 0                 | 0  | 0                        | 1  | 1  | 1  | 1                             | 0  | 10              | 62.5          |
| Ozyemisci-Taskiran <i>et al.</i> (2015) | 1         | 1 | 0 | 1 | 1 | 1 | 1  | 0                 | 0  | 0                        | 1  | 1  | 1  | 1                             | 0  | 10              | 62.5          |

|                                    |     |     |      |      |     |      |      |      |     |   |      |     |     |      |      |    |                  |
|------------------------------------|-----|-----|------|------|-----|------|------|------|-----|---|------|-----|-----|------|------|----|------------------|
| Park & Larson <i>et al.</i> (2015) | 1   | 1   | 0    | 2    | 1   | 1    | 1    | 1    | 1   | 0 | 1    | 1   | 1   | 1    | 1    | 14 | 87.5             |
| Park <i>et al.</i> (2018)          | 1   | 1   | 0    | 2    | 1   | 1    | 0    | 1    | 1   | 0 | 1    | 1   | 1   | 0    | 1    | 12 | 75.0             |
| Park <i>et al.</i> (2020)          | 1   | 1   | 1    | 1    | 1   | 1    | 1    | 0    | 0   | 0 | 1    | 1   | 1   | 0    | 0    | 10 | 62.5             |
| Randeep <i>et al.</i> (2019)       | 1   | 1   | 1    | 0    | 1   | 1    | 1    | 0    | 0   | 0 | 1    | 1   | 1   | 1    | 0    | 10 | 62.5             |
| Roncero <i>et al.</i> (2016)       | 1   | 1   | 1    | 2    | 1   | 1    | 1    | 0    | 0   | 0 | 1    | 1   | 1   | 0    | 1    | 12 | 75.0             |
| Schure <i>et al.</i> (2016)        | 1   | 1   | 1    | 2    | 1   | 1    | 0    | 0    | 0   | 0 | 1    | 1   | 1   | 0    | 1    | 11 | 68.75            |
| Soysal <i>et al.</i> (2015)        | 1   | 1   | 0    | 0    | 1   | 1    | 0    | 0    | 0   | 0 | 1    | 1   | 1   | 0    | 1    | 8  | 50.0             |
| Tudorache <i>et al.</i> (2017)     | 1   | 1   | 1    | 2    | 1   | 1    | 1    | 0    | 0   | 0 | 1    | 1   | 1   | 0    | 1    | 12 | 75.0             |
| Van Hove <i>et al.</i> (2021)      | 1   | 1   | 1    | 2    | 1   | 1    | 1    | 0    | 0   | 0 | 1    | 1   | 1   | 0    | 1    | 12 | 75.0             |
| Yazar <i>et al.</i> (2018)         | 1   | 1   | 1    | 2    | 1   | 1    | 1    | 1    | 0   | 0 | 1    | 1   | 1   | 0    | 1    | 13 | 81.25            |
| Yohannes <i>et al.</i> (2021)      | 1   | 1   | 1    | 1    | 1   | 1    | 1    | 0    | 0   | 0 | 1    | 1   | 1   | 0    | 0    | 10 | 62.5             |
| Total for each item                | 31  | 31  | 23   | 34   | 31  | 30   | 23   | 7    | 2   | 0 | 30   | 31  | 31  | 8    | 12   |    | Mean per study % |
|                                    |     |     |      |      |     |      |      |      |     |   |      |     |     |      |      |    |                  |
| % per each item                    | 100 | 100 | 74.2 | 54.8 | 100 | 96.8 | 74.2 | 22.6 | 6.5 | 0 | 96.8 | 100 | 100 | 25.8 | 38.7 |    | 65.52%           |

**Table 2: Downs and Black Quality Appraisal**

| Study (Year)       | Reporting (/11) | External Validity (/3) | Internal Validity – bias (/7) | Internal Validity – confounding (/6) | Power (/1) | Total Score | Total Score (%) |
|--------------------|-----------------|------------------------|-------------------------------|--------------------------------------|------------|-------------|-----------------|
| Abumossalam (2021) | 8               | 0                      | 6                             | 4                                    | 0          | 18/28       | 64.3            |
| Aquino (2016)      | 7               | 0                      | 6                             | 4                                    | 0          | 17/28       | 60.7            |
| Dal Negro (2012)   | 7               | 0                      | 7                             | 2                                    | 0          | 16/28       | 57.1            |
| Emery (1998)       | 8               | 0                      | 6                             | 3                                    | 0          | 17/28       | 60.7            |

|                   |    |   |   |   |   |       |      |
|-------------------|----|---|---|---|---|-------|------|
| Etnier (2001)     | 8  | 0 | 4 | 4 | 0 | 16/28 | 57.1 |
| Kilic (2021)      | 7  | 1 | 5 | 4 | 1 | 18/28 | 64.3 |
| Kozora (2002)     | 6  | 1 | 5 | 1 | 0 | 13/28 | 46.4 |
| Kozora (2005)     | 6  | 0 | 5 | 2 | 0 | 13/28 | 46.4 |
| Lavoie (2019)     | 7  | 0 | 6 | 3 | 0 | 16/28 | 57.1 |
| Liu (2021)        | 7  | 1 | 5 | 4 | 0 | 17/28 | 60.7 |
| NOTT (1980)       | 8  | 0 | 7 | 2 | 0 | 17/28 | 60.7 |
| Rosenstein (2020) | 8  | 0 | 7 | 3 | 0 | 18/28 | 64.3 |
| van Beers (2021)  | 10 | 2 | 7 | 5 | 1 | 25/28 | 89.3 |

**Mean per study (%) = 60.7**

**Mean Reporting (%) = 67.8**

**Mean External Validity (%) = 12.8**

**Mean Internal Validity—bias (%) = 83.5**

**Mean Internal Validity—confounding (%) = 52.6**

**Power (%) = 15.4**

## Appendix: Database Search Strategies (full electronic search strategy for Ovid MEDLINE)

Ovid MEDLINE(R) ALL <1946 to July 19, 2021>

Search history sorted by search number ascending

| #  | Searches                                                  | Results | Type     |
|----|-----------------------------------------------------------|---------|----------|
| 1  | [COPD]                                                    | 0       | Advanced |
| 2  | exp Pulmonary Disease, Chronic Obstructive/               | 59509   | Advanced |
| 3  | Lung Diseases, Obstructive/ [previous term]               | 18233   | Advanced |
| 4  | Coad.mp.                                                  | 548     | Advanced |
| 5  | Copd.mp.                                                  | 50878   | Advanced |
| 6  | (centriacinar adj2 emphysema*).mp.                        | 34      | Advanced |
| 7  | (centrilobular adj2 emphysema*).mp.                       | 221     | Advanced |
| 8  | (chronic adj3 obstructive bronchopulmonary disease*).mp.  | 55      | Advanced |
| 9  | (chronic adj3 airflow obstruction*).mp.                   | 703     | Advanced |
| 10 | (chronic adj3 bronchitis).mp.                             | 11518   | Advanced |
| 11 | (chronic adj3 obstructive airway disease*).mp.            | 410     | Advanced |
| 12 | (chronic adj3 obstructive lung disease*).mp.              | 4820    | Advanced |
| 13 | (chronic adj3 obstructive lung disorder*).mp.             | 12      | Advanced |
| 14 | (chronic adj3 obstructive pulmonary disease*).mp.         | 53814   | Advanced |
| 15 | (chronic adj3 obstructive pulmonary disorder*).mp.        | 270     | Advanced |
| 16 | (chronic adj3 obstructive respiratory disease*).mp.       | 133     | Advanced |
| 17 | (chronic adj3 obstructive respiratory tract disease*).mp. | 47      | Advanced |
| 18 | (focal adj2 emphysema*).mp.                               | 52      | Advanced |
| 19 | (lung adj3 chronic obstructive disease*).mp.              | 13      | Advanced |
| 20 | (panacinar adj2 emphysema*).mp.                           | 100     | Advanced |
| 21 | (panlobular adj2 emphysema*).mp.                          | 122     | Advanced |
| 22 | (pulmonary adj2 emphysema*).mp.                           | 17727   | Advanced |
| 23 | or/1-22                                                   | 112100  | Advanced |
| 24 | [Cognitive Function]                                      | 0       | Advanced |
| 25 | exp Cognition/                                            | 172778  | Advanced |
| 26 | exp Cognitive Dysfunction/                                | 23687   | Advanced |
| 27 | Cognition Disorders/ [previous heading, not exploded]     | 65227   | Advanced |
| 28 | exp Fatigue/                                              | 32539   | Advanced |
| 29 | exp Sleep/                                                | 84998   | Advanced |

|    |                               |        |          |
|----|-------------------------------|--------|----------|
| 30 | exp Sleep Wake Disorders/     | 96281  | Advanced |
| 31 | exp Sleep Apnea Syndromes/    | 38264  | Advanced |
| 32 | exp Anxiety/                  | 93802  | Advanced |
| 33 | Depression/                   | 130129 | Advanced |
| 34 | exp Anxiety Disorders/        | 82716  | Advanced |
| 35 | exp Depressive Disorder/      | 113657 | Advanced |
| 36 | Affective Symptoms/           | 13376  | Advanced |
| 37 | exp Neuropsychological Tests/ | 183890 | Advanced |
| 38 | Executive Function/           | 16503  | Advanced |
| 39 | exp learning/                 | 402627 | Advanced |
| 40 | exp Memory/                   | 142987 | Advanced |
| 41 | exp Verbal Behavior/          | 45172  | Advanced |
| 42 | Sleepiness/                   | 483    | Advanced |
| 43 | Polysomnography/              | 22728  | Advanced |
| 44 | exp Emotions/                 | 263871 | Advanced |
| 45 | exp Motivation/               | 177964 | Advanced |
| 46 | cognition.mp.                 | 218459 | Advanced |
| 47 | cognitive.mp.                 | 405865 | Advanced |
| 48 | sleep*.mp.                    | 224246 | Advanced |
| 49 | fatigue*.mp.                  | 118184 | Advanced |
| 50 | anxiety.mp.                   | 259963 | Advanced |
| 51 | depression.mp.                | 431942 | Advanced |
| 52 | emotion*.mp.                  | 243652 | Advanced |
| 53 | mood*.mp.                     | 91229  | Advanced |
| 54 | (affective adj2 symptom*).mp. | 15847  | Advanced |
| 55 | memory.mp.                    | 301372 | Advanced |
| 56 | learning.mp.                  | 441337 | Advanced |
| 57 | neurocognitive.mp.            | 32120  | Advanced |
| 58 | tired*.mp.                    | 6241   | Advanced |
| 59 | insomnia*.mp.                 | 24152  | Advanced |
| 60 | hypersomnia*.mp.              | 2135   | Advanced |
| 61 | Polysomnography.mp.           | 28124  | Advanced |
| 62 | osa.mp.                       | 15903  | Advanced |
| 63 | mini-mental state exam*.mp.   | 15580  | Advanced |

|    |                                            |         |          |
|----|--------------------------------------------|---------|----------|
| 64 | MMSE.mp.                                   | 12045   | Advanced |
| 65 | Executive function.mp.                     | 27584   | Advanced |
| 66 | (neuropsychological adj2 test*).mp.        | 103855  | Advanced |
| 67 | Mini Mental Status Exam*.mp.               | 1313    | Advanced |
| 68 | 3MS.mp.                                    | 391     | Advanced |
| 69 | Abbreviated Mental Test*.mp.               | 319     | Advanced |
| 70 | Wisconsin Card Sorting Test*.mp.           | 2294    | Advanced |
| 71 | WCST.mp.                                   | 1503    | Advanced |
| 72 | Stroop Color Word test.mp.                 | 577     | Advanced |
| 73 | SCWT.mp.                                   | 149     | Advanced |
| 74 | Trail Making Test.mp.                      | 3839    | Advanced |
| 75 | Wechsler Adult Intelligence Scale.mp.      | 2077    | Advanced |
| 76 | WAIS.mp.                                   | 2972    | Advanced |
| 77 | digit span test.mp.                        | 499     | Advanced |
| 78 | (verbal adj2 fluency).mp.                  | 6228    | Advanced |
| 79 | Clock Drawing Test.mp.                     | 930     | Advanced |
| 80 | Mini-Cog Test.mp.                          | 41      | Advanced |
| 81 | Six-Item Screener.mp.                      | 52      | Advanced |
| 82 | 6CIT.mp.                                   | 25      | Advanced |
| 83 | (nighttime adj2 symptom*).mp.              | 378     | Advanced |
| 84 | STAI.mp.                                   | 3810    | Advanced |
| 85 | Motivation.mp.                             | 121499  | Advanced |
| 86 | Apathy.mp.                                 | 5728    | Advanced |
| 87 | or/24-86                                   | 2397241 | Advanced |
| 88 | [exercise capacity and muscle performance] | 0       | Advanced |
| 89 | exp Exercise Test/                         | 67196   | Advanced |
| 90 | Exercise Tolerance/                        | 13581   | Advanced |
| 91 | exp Exercise/                              | 213451  | Advanced |
| 92 | exp gait/                                  | 31648   | Advanced |
| 93 | exp muscle strength/                       | 37724   | Advanced |
| 94 | exp Psychomotor Performance/               | 116678  | Advanced |
| 95 | Quadriceps Muscle/                         | 5797    | Advanced |
| 96 | exp muscle contraction/                    | 202566  | Advanced |
| 97 | muscle fatigue/                            | 8595    | Advanced |

|     |                                                             |        |          |
|-----|-------------------------------------------------------------|--------|----------|
| 98  | exp Athletic Performance/                                   | 57686  | Advanced |
| 99  | exp Respiratory Muscles/                                    | 27278  | Advanced |
| 100 | maximal respiratory pressures/                              | 163    | Advanced |
| 101 | respiratory function tests/ [previous heading not exploded] | 47610  | Advanced |
| 102 | exercise*.mp.                                               | 408895 | Advanced |
| 103 | (physical adj2 activit*).mp.                                | 128506 | Advanced |
| 104 | (muscle* adj2 strength*).mp.                                | 41650  | Advanced |
| 105 | (muscle* adj2 contraction*).mp.                             | 109793 | Advanced |
| 106 | (muscle* adj2 fatigue*).mp.                                 | 12310  | Advanced |
| 107 | (physical adj2 function*).mp.                               | 35351  | Advanced |
| 108 | (physical adj2 fitness*).mp.                                | 33696  | Advanced |
| 109 | (athletic adj2 performance*).mp.                            | 14754  | Advanced |
| 110 | (motor adj2 performance*).mp.                               | 10093  | Advanced |
| 111 | (motor adj2 strength*).mp.                                  | 1038   | Advanced |
| 112 | (motor adj2 control*).mp.                                   | 17009  | Advanced |
| 113 | walking.mp.                                                 | 89795  | Advanced |
| 114 | balance.mp.                                                 | 274540 | Advanced |
| 115 | dual-task.mp.                                               | 5094   | Advanced |
| 116 | walk-test.mp.                                               | 10098  | Advanced |
| 117 | 6MWT.mp.                                                    | 3387   | Advanced |
| 118 | 6MWD.mp.                                                    | 1886   | Advanced |
| 119 | (Muscle adj2 function*).mp.                                 | 19097  | Advanced |
| 120 | Gait.mp.                                                    | 65663  | Advanced |
| 121 | (grip adj2 strength*).mp.                                   | 13212  | Advanced |
| 122 | (hand adj2 strength*).mp.                                   | 18117  | Advanced |
| 123 | (motor adj2 coordination*).mp.                              | 6146   | Advanced |
| 124 | (motor adj2 performance*).mp.                               | 10093  | Advanced |
| 125 | (psychomotor adj2 performance*).mp.                         | 67039  | Advanced |
| 126 | quadriceps.mp.                                              | 19075  | Advanced |
| 127 | rectus femoris.mp.                                          | 4009   | Advanced |
| 128 | vastus intermedius.mp.                                      | 503    | Advanced |
| 129 | vastus lateralis.mp.                                        | 8508   | Advanced |
| 130 | vastus medialis.mp.                                         | 2494   | Advanced |
| 131 | CPET.mp.                                                    | 1652   | Advanced |

|                                                                                     |         |          |
|-------------------------------------------------------------------------------------|---------|----------|
| 132 BODE index.mp.                                                                  | 430     | Advanced |
| 133 Cycling.mp.                                                                     | 67342   | Advanced |
| 134 Treadmill.mp.                                                                   | 33720   | Advanced |
| 135 "timed up and go test".mp.                                                      | 2916    | Advanced |
| 136 (Tug adj2 test).mp.                                                             | 1783    | Advanced |
| 137 (Respiratory adj2 muscle*).mp.                                                  | 10739   | Advanced |
| 138 (Ventilatory adj2 muscle*).mp.                                                  | 308     | Advanced |
| 139 (intercostal adj2 muscle*).mp.                                                  | 2886    | Advanced |
| 140 diaphragm.mp.                                                                   | 38825   | Advanced |
| 141 (maximal adj2 expiratory pressure*).mp.                                         | 509     | Advanced |
| 142 (maximal adj2 inspiratory pressure*).mp.                                        | 1215    | Advanced |
| 143 (maximal adj2 respiratory pressure*).mp.                                        | 364     | Advanced |
| 144 (maximum adj2 expiratory pressure*).mp.                                         | 297     | Advanced |
| 145 (maximum adj2 inspiratory pressure*).mp.                                        | 545     | Advanced |
| 146 (maximum adj2 respiratory pressure*).mp.                                        | 71      | Advanced |
| 147 PImax.mp.                                                                       | 600     | Advanced |
| 148 PEmax.mp.                                                                       | 310     | Advanced |
| 149 Cognitive interference.mp.                                                      | 316     | Advanced |
| 150 or/88-149                                                                       | 1382327 | Advanced |
| 151 23 and 87                                                                       | 8916    | Advanced |
| 152 150 and 151                                                                     | 2848    | Advanced |
| 153 animals/ not (animals/ and humans/)                                             | 4828969 | Advanced |
| 154 152 not 153                                                                     | 2818    | Advanced |
| 155 limit 154 to ("all infant (birth to 23 months)" or "all child (0 to 18 years)") | 69      | Advanced |
| 156 limit 154 to "all adult (19 plus years)"                                        | 1829    | Advanced |
| 157 154 not 155                                                                     | 2749    | Advanced |
| 158 156 or 157                                                                      | 2804    | Advanced |
| 159 limit 158 to english language                                                   | 2521    | Advanced |
| 160 remove duplicates from 159                                                      | 2514    | Advanced |
